# Supplementary material for: Sex-Determining Region Y Box 4 Is a Transforming Oncogene in Human Prostate Cancer Cells
Source: Oxford University Press journal article supplement (doi:10.1158/0008-5472.can-05-3055), 2006-04-15
Supplement: 00085472can053055-sup-can-05-3055-supp_pdf_zip.zip [file 00085472can053055-sup-can-05-3055-supp_pdf_zip.zip]

Archive with 1 entries (1 files):
- 00085472can053055-sup-CAN-05-3055-Supp.PDF
